# Supplementary material for: Barium fluoride hollow microcubes: hydrothermal synthesis and host for lanthanide near-infrared luminescent properties
Source: Royal Society of Chemistry journal article supplement (doi:10.1039/b923936g), 2010-01-01
Supplement: b923936g.pdf [file b923936g.pdf]

## Supporting Information

Barium fluoride hollow microcubes: hydrothermal synthesis and host for lanthanide near-infrared luminescent properties

Suying Hou,<sup>a</sup> Yan Xing\*,<sup>a</sup> Xianchun Liu,<sup>a</sup> Yongcun Zou,<sup>b</sup> Bo Liu,<sup>a</sup> Xiujuan Sun

<sup>a</sup>College of Chemistry, Northeast Normal University, Changchun 130024, P R China.  
E-mail: xingyan69cn@yahoo.com.cn

<sup>b</sup>State Key Laboratory of Inorganic Synthesis and Preparative Chemistry of Jilin University, Changchun 130012, P. R. China

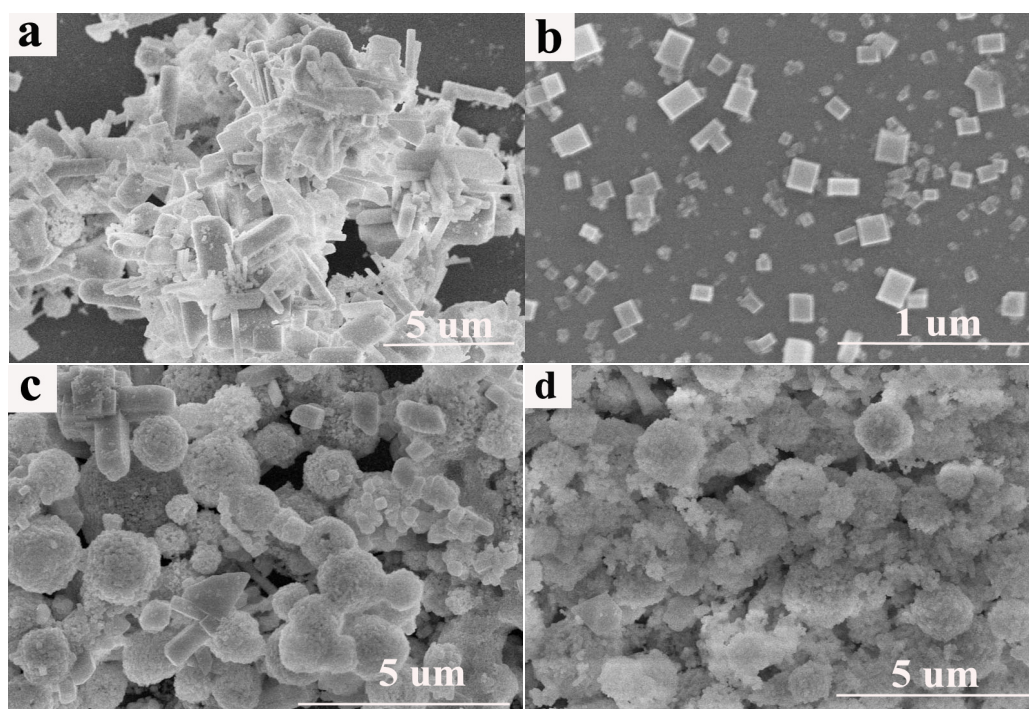

**Fig. S1** SEM images of the as-prepared BaF<sub>2</sub> samples (a) in the absence of P123 and with different additives (b) CTAB (c) PVP and (d) PEG-4000.

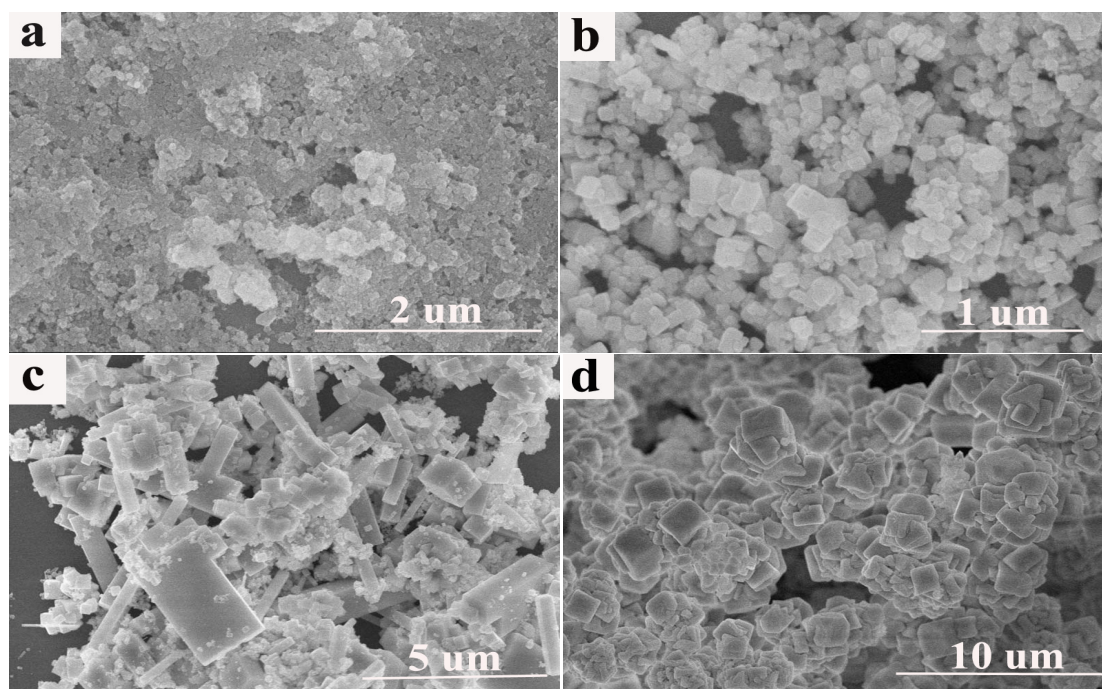

**Fig. S2** SEM image of the as-prepared BaF<sub>2</sub> samples in the absence of Cit<sup>3-</sup> under otherwise same reaction conditions (a) and SEM images of the samples obtained from different fluoride sources (b)NaF, (c) NH<sub>4</sub>F and (d) HF.

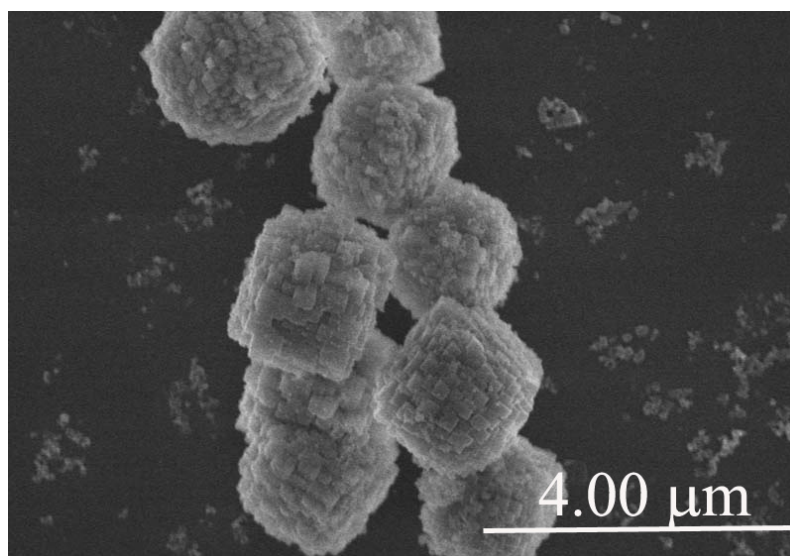

**Fig. S3** SEM image of the as-prepared Nd<sup>3+</sup>-doped BaF<sub>2</sub> samples.
